# Supplementary material for: Keratinocytes Regulate the Threshold of Inflammation by Inhibiting T Cell Effector Functions
Source: MDPI journal article supplement (doi:10.3390/cells10071606), 2021-06-26
Supplement: s1 [file s1]

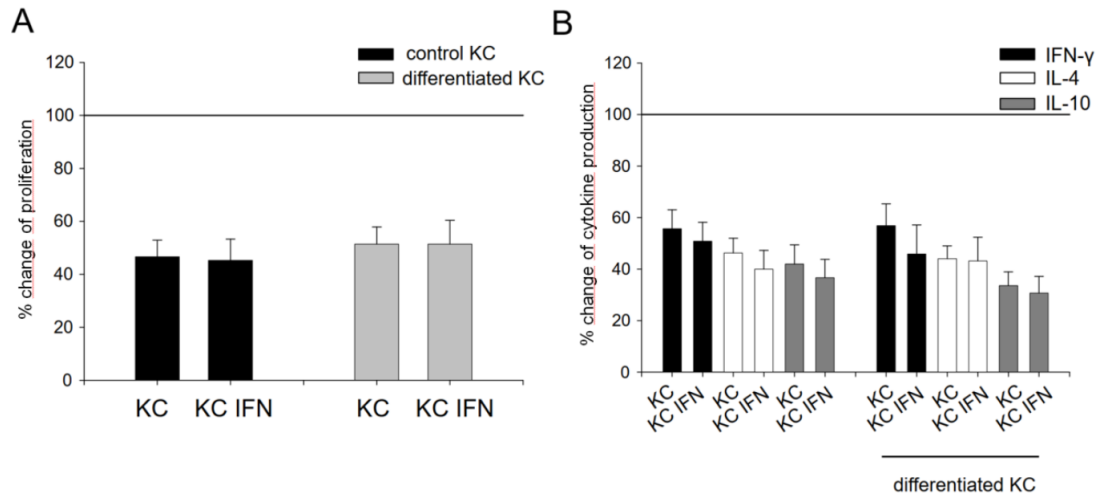

**Figure S1. Keratinocyte differentiation does not impact the capacity of keratinocytes to inhibit T cell proliferation and cytokine production.** Keratinocytes (KC) were cultured under differentiating conditions (1.2mM CaCl<sub>2</sub>) for 24 hours before usage in co-culture experiments with T cells. After differentiation culture, KC or IFN- $\gamma$  pre-stimulated KC (KC IFN), autologous nickel-specific T cell clones and DCs were incubated in a ratio of 10:100:1 in the presence of nickel-sulphate. After 48 hours, nickel-specific T cell proliferation was measured by <sup>3</sup>H-Thymidine incorporation (A) and production of cytokines was detected in cell free co-culture supernatants by ELISA (B).
